# Supplementary material
Source: HighWire-hosted journal article supplement (https://www.canjsurg.ca/highwire/filestream/97447/field_highwire_adjunct_files/0/CJS-002221-1-at.pdf)
Supplement: CJS-002221-1-at.pdf [file CJS-002221-1-at.pdf]

## Appendix 1. Study code list

### Cohort Build

| CODE TYPE     | Codes | Description                          |
|---------------|-------|--------------------------------------|
| OHIP Fee Code | R441  | Total replacement/both compartments. |

### Outcomes:

#### Arthroscopy

| CODE TYPE     | Codes      | Description                                                                                                                                                    |
|---------------|------------|----------------------------------------------------------------------------------------------------------------------------------------------------------------|
| OHIP Fee Code | R687       | Knee arthroscopy set-up, includes when rendered synovial biopsy and/or resection or trimming of plica                                                          |
|               | R191       | Synovial biopsy                                                                                                                                                |
|               | R192       | Trimming of plica, tissue, meniscus                                                                                                                            |
|               | R193       | Removal of loose body, screw                                                                                                                                   |
|               | R194       | Resection of plica                                                                                                                                             |
|               | R195       | Lateral release                                                                                                                                                |
|               | Z218       | Diagnostic arthroscopy (sole procedure                                                                                                                         |
|               | E595       | arthroscopy in association with surgery                                                                                                                        |
|               | R204       | Debridement, 1 compartment                                                                                                                                     |
|               | R205       | Debridement, more than 1 compartment                                                                                                                           |
|               | R207       | Meniscectomy                                                                                                                                                   |
|               | R208       | Repair medial or lateral meniscus                                                                                                                              |
| CCP Code      | 9285       | arthroscopy, knee                                                                                                                                              |
| CCI Code      | IVG52DA    | Drainage, knee joint using endoscopic [arthroscopic] approach                                                                                                  |
|               | 1VG80FY    | Repair, knee joint endoscopic [arthroscopic] approach no tissue used (for repair) with meniscectomy [or meniscoplasty]                                         |
|               | 1VG80FYXXA | Repair, knee joint endoscopic [arthroscopic] approach with autograft [e.g. bone, cartilage, or tendon] with meniscectomy [or meniscoplasty]                    |
|               | 1VG80FYXXK | Repair, knee joint endoscopic [arthroscopic] approach with homograft graft [e.g. bone or cartilage] with meniscectomy [or meniscoplasty]                       |
|               | 1VG80FYXXN | Repair, knee joint endoscopic [arthroscopic] approach with synthetic tissue [e.g. gortex, artificial polymer cartilage] with meniscectomy [or meniscoplasty]   |
|               | 1VG80FYXXQ | Repair, knee joint endoscopic [arthroscopic] approach with combined sources of tissue [e.g. bone graft, synthetic tissue] with meniscectomy [or meniscoplasty] |

#### MRI

| CODE TYPE     | Codes | Description                                                                                         |
|---------------|-------|-----------------------------------------------------------------------------------------------------|
| OHIP Fee Code | X471  | magnetic resonance imaging, extremity or joint; multislice sequence, one extremity and/or one joint |

### ***Injection***

| CODE TYPE     | Codes | Description                                                                            |
|---------------|-------|----------------------------------------------------------------------------------------|
| OHIP Fee Code | G370  | Injection of bursa, or injection and/or aspiration of joint, ganglion or tendon sheath |

### **Diagnoses:**

#### ***Osteoarthritis***

| CODE TYPE    | Codes | Description                             |
|--------------|-------|-----------------------------------------|
| OHIP DX Code | 715   | Osteoarthritis                          |
| ICD-9        | 715   | GENERAL OSTEOARTHRITIS                  |
| ICD-10       | M170  | Primary gonarthrosis, bilateral         |
|              | M171  | Other primary gonarthrosis              |
|              | M172  | Post-traumatic gonarthrosis, bilateral  |
|              | M173  | Other post-traumatic gonarthrosis       |
|              | M174  | Other secondary gonarthrosis, bilateral |
|              | M175  | Other secondary gonarthrosis            |
|              | M179  | Gonarthrosis, unspecified               |

#### **Meniscus**

|               |       |                                                                        |
|---------------|-------|------------------------------------------------------------------------|
| OHIP Fee Code | E495  | Meniscectomy, partial or total, for symptomatic meniscal tear, to R687 |
|               |       |                                                                        |
| ICD-9         | 7170  | OLD BUCKET TEAR MED MEN                                                |
|               | 7171  | DERANG ANT MED MENISCUS                                                |
|               | 7172  | DERANG POST MED MENISCUS                                               |
|               | 7173  | DERANG MED MENISCUS NEC                                                |
|               | 71740 | DERANG LAT MENISCUS NOS                                                |
|               | 71741 | OLD BUCKET TEAR LAT MEN                                                |
|               | 71742 | DERANGE ANT LAT MENISCUS                                               |
|               | 71743 | DERANG POST LAT MENISCUS                                               |

|               |              |                                                                                        |
|---------------|--------------|----------------------------------------------------------------------------------------|
|               | <b>71749</b> | <b>DERANG LAT MENISCUS NEC</b>                                                         |
|               | <b>7175</b>  | <b>DERANGEMENT MENISCUS NEC</b>                                                        |
|               | <b>8360</b>  | <b>TEAR MED MENISC KNEE-CUR</b>                                                        |
|               | <b>8361</b>  | <b>TEAR LAT MENISC KNEE-CUR</b>                                                        |
|               | <b>8362</b>  | <b>TEAR MENISCUS NEC-CURREN</b>                                                        |
| <b>ICD-10</b> | <b>M2320</b> | <b>Derangement of meniscus due to old tear or injury, multiple sites</b>               |
|               | <b>M2321</b> | <b>Derangement of anterior horn of medial meniscus due to old tear or injury</b>       |
|               | <b>M2322</b> | <b>Derangement of posterior horn of medial meniscus due to old tear or injury</b>      |
|               | <b>M2323</b> | <b>Derangement of other and unspecified medial meniscus due to old tear or injury</b>  |
|               | <b>M2324</b> | <b>Derangement of anterior horn of lateral meniscus due to old tear or injury</b>      |
|               | <b>M2325</b> | <b>Derangement of posterior horn of lateral meniscus due to old tear or injury</b>     |
|               | <b>M2326</b> | <b>Derangement of other and unspecified lateral meniscus due to old tear or injury</b> |
|               | <b>M2329</b> | <b>Derangement of unspecified meniscus due to old tear or injury</b>                   |
|               | <b>M2330</b> | <b>Other meniscus derangements, multiple sites</b>                                     |
|               | <b>M2331</b> | <b>Other derangement of anterior horn of medial meniscus</b>                           |
|               | <b>M2332</b> | <b>Other derangement of posterior horn of medial meniscus</b>                          |
|               | <b>M2333</b> | <b>Other derangement of other and unspecified medial meniscus</b>                      |
|               | <b>M2334</b> | <b>Other derangement of anterior horn of lateral meniscus</b>                          |
|               | <b>M2335</b> | <b>Other derangement of posterior horn of lateral meniscus</b>                         |
|               | <b>M2336</b> | <b>Other derangement of other and unspecified lateral meniscus</b>                     |
|               | <b>M2339</b> | <b>Other derangement of unspecified meniscus</b>                                       |
|               | <b>S8320</b> | <b>Tear of medial meniscus of knee, current</b>                                        |
|               | <b>S8321</b> | <b>Tear of lateral meniscus of knee, current</b>                                       |
|               | <b>S8329</b> | <b>Tear of meniscus of knee, unspecified</b>                                           |

### **Pain**

| <b>CODE TYPE</b> | <b>Codes</b> | <b>Description</b>                   |
|------------------|--------------|--------------------------------------|
| <b>ICD-9</b>     | <b>71940</b> | <b>JOINT PAIN-UNSPEC</b>             |
|                  | <b>71946</b> | <b>JOINT PAIN-L/LEG</b>              |
| <b>ICD-10</b>    | <b>M2550</b> | <b>Pain in joint, multiple sites</b> |
|                  | <b>M2556</b> | <b>Pain in joint, lower leg</b>      |
